# Supplementary material
Source: Springer Nature journal article supplement (https://www.springermedizin.de/resource/supplementary/12889_2012_4461_MOESM4_ESM.pdf/9493070)

Men

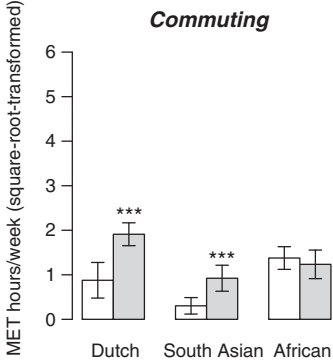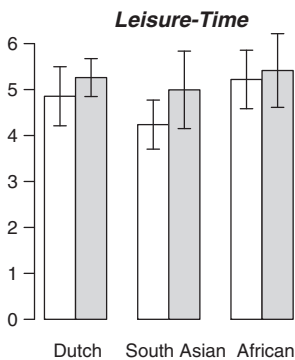

Women

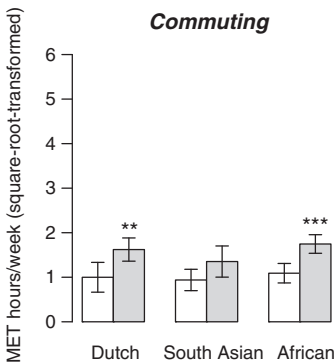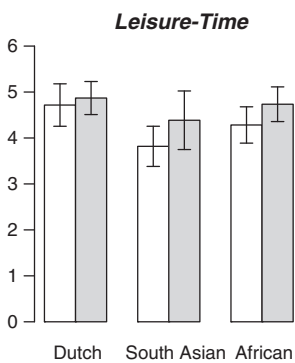

□ low level of education  
■ high level of education

Supplement: MOESM4 [file 9493070]
